# Supplementary material for: Comparative transcriptome analysis to investigate the potential role of miRNAs in milk protein/fat quality
Source: PubMed Central journal article supplement (PMC5908868; doi:10.1038/s41598-018-24727-y), 2018-04-19

Supplementary information

# **Comparative transcriptome analysis to investigate the potential role of miRNAs in milk protein/fat quality**

Xuehui Wang, Li Zhang, Jing Jin, Anting Xia, Chunmei Wang\*, Yingjun Cui, Bo Qu, Qingzhang Li and Chunyan Sheng

Key Laboratory of Dairy Science of Education Ministry, Northeast Agricultural University, Harbin 150030, Heilongjiang, China;

\* Corresponding author: Chunmei Wang Key Laboratory of Dairy Science of Education Ministry, Northeast Agricultural University, Harbin 150030, Heilongjiang, China, Tel: +86 13936507139, E-mail: wangcm-1@163.com (W.C.)

**Table S1.** Concentrate composition of lactating and dry cow rations

| <b>Concentrate composition (%)</b> | <b>Lactating</b> | <b>Dry</b> |
|------------------------------------|------------------|------------|
| Corn                               | /                | 67.5       |
| Cottonseed                         | 15               | 8          |
| Rapeseed                           | 8                | 6          |
| Soybean meal                       | 12               | /          |
| Extruded soybean                   | 30               | 4          |
| Wheat bran                         | /                | 10         |
| Limestone                          | 2                | 1.5        |
| Sodium bicarbonate                 | 2                | 1          |
| Calcium bicarbonate                | 2.7              | 1          |
| Sodium chloride                    | 1.5              | /          |
| DDGS                               | 24               | /          |
| Methionine                         | 0.8              | /          |
| Mineral and vitamin premix         | 2                | 1          |

**Figure S1.** Functional enrichment analysis and pathways classification targets of differentially expressed miRNAs. **(A)** Functional enrichment analysis of targets by 38 differentially expressed miRNAs in H and L group. **(B)** Pathway classification of targets by 38 differentially expressed miRNAs in H and L group.

**A**

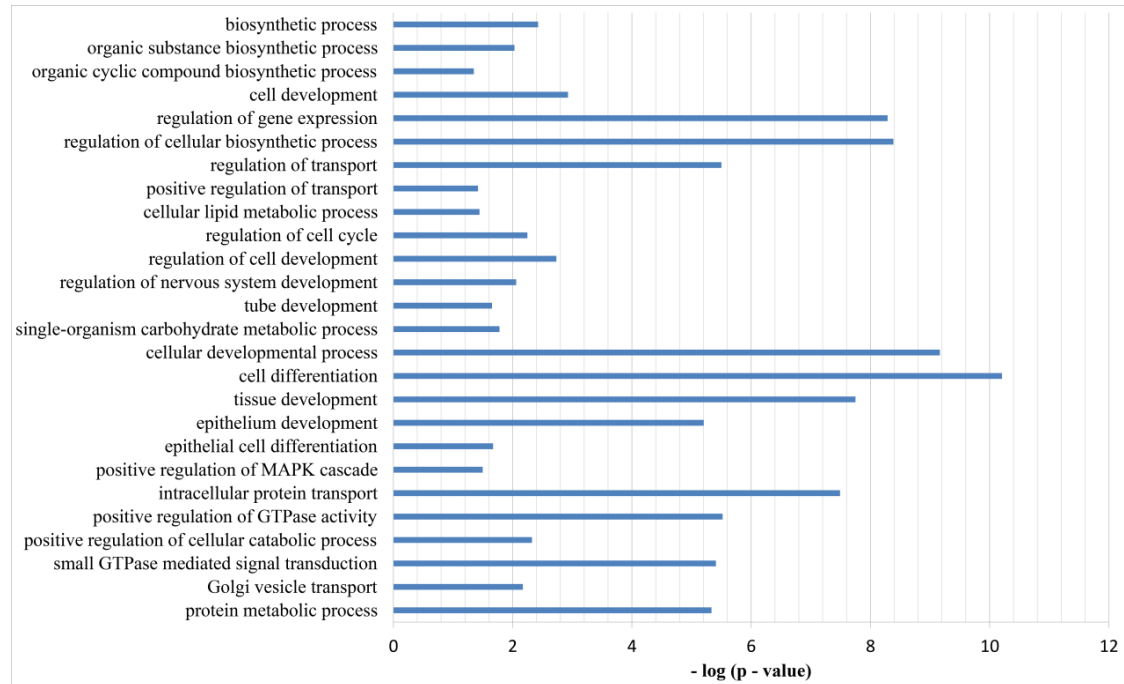

**B**

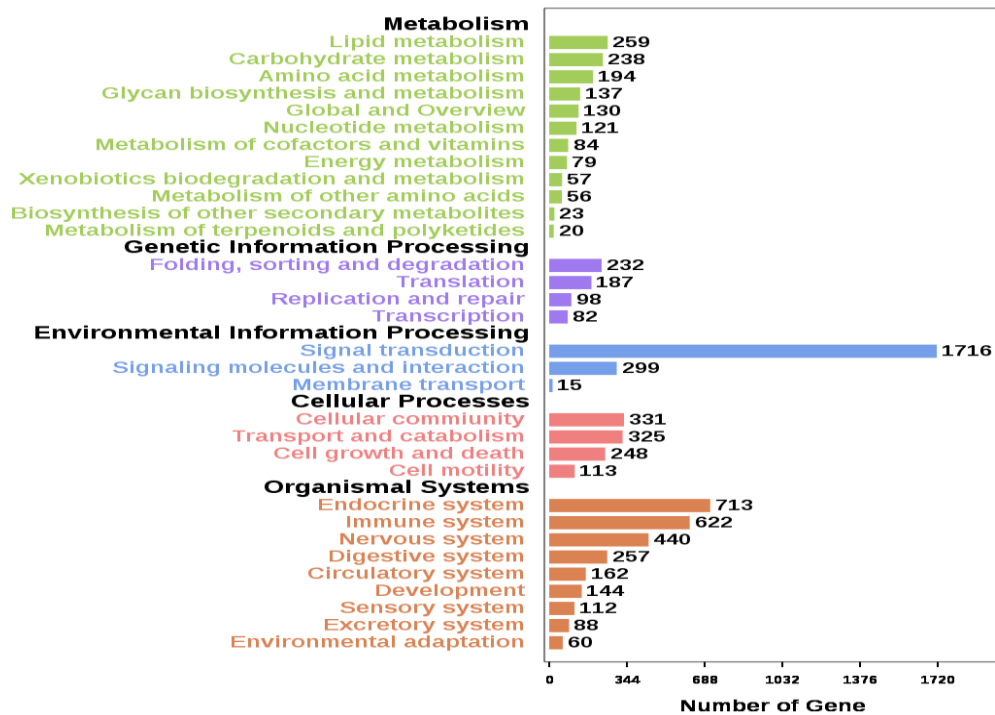

**Figure S2.** (A) Gene pathway network analysis results indicated that signal transduction, cell cycle and metabolism were the most important pathway in H vs. L of putative gene. (B) Gene correlation was analysis based on pathway from KEGG database, showing that most genes have one association on the same pathway of the same database.

**A**

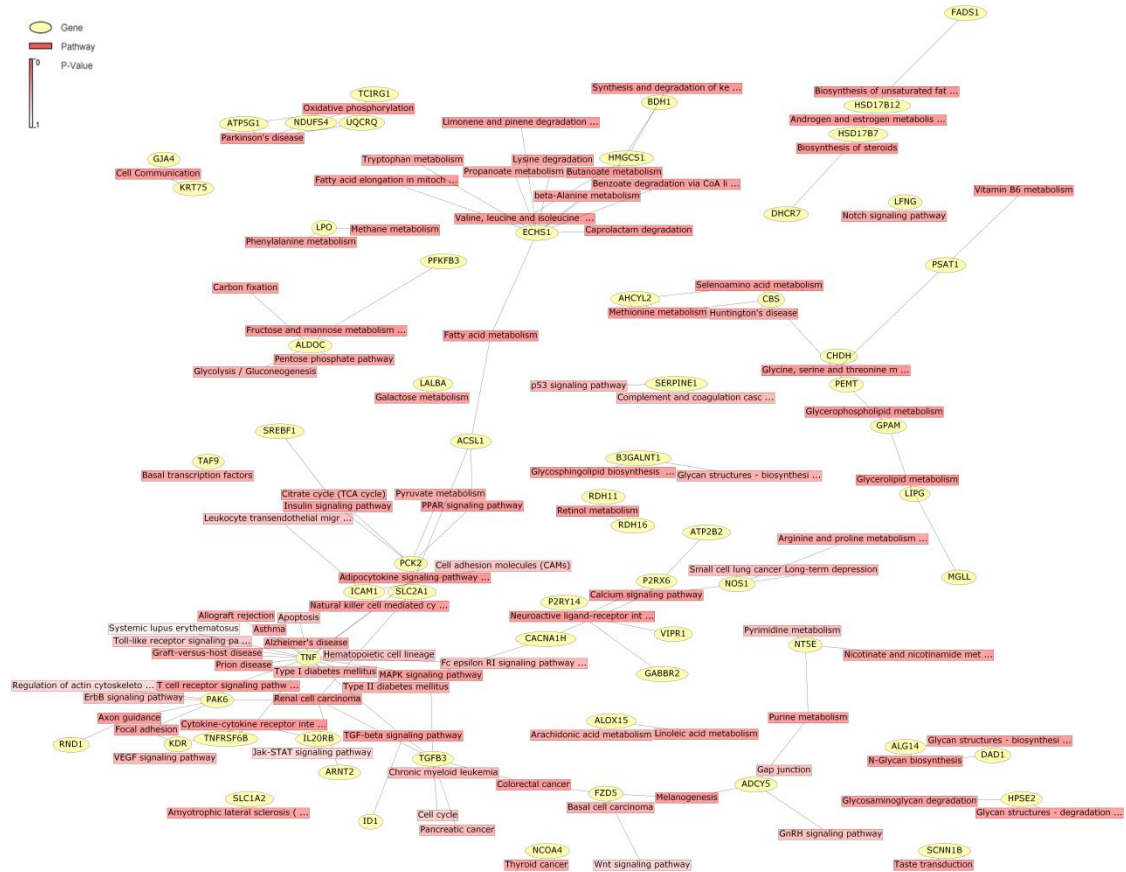

**B**

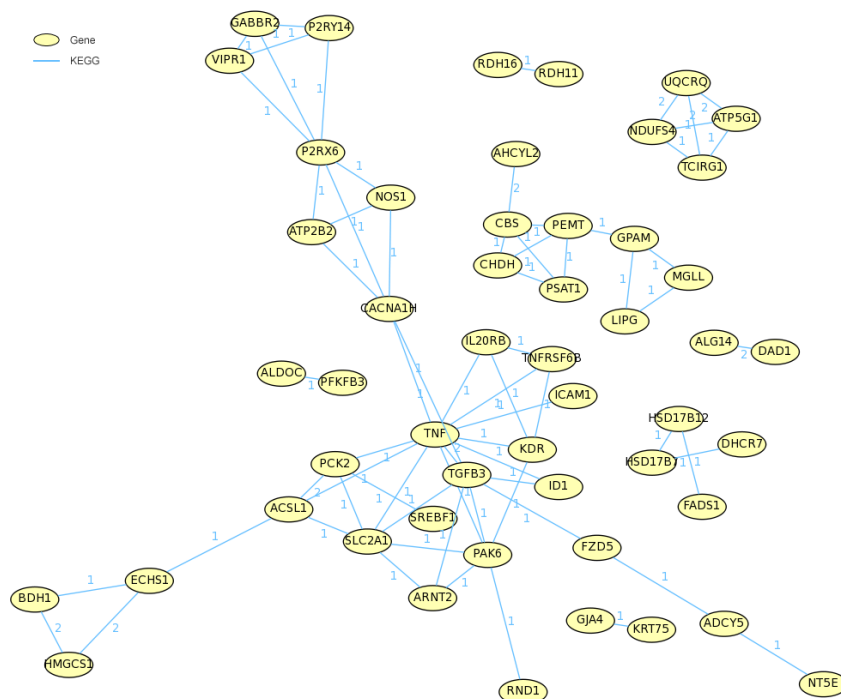

**Table S2.** RIP gene differentially expressed in L compared to H sample.

| <b>Gene symbol</b> | <b>Difference in log<sub>2</sub> FC<br/>(L / H)</b> | <b>P value</b> |
|--------------------|-----------------------------------------------------|----------------|
| <i>LALBA</i>       | 2.82                                                | 4.99E-07       |
| <i>ABCG2</i>       | 2.51                                                | 7.52E-06       |
| <i>HSTN</i>        | 2.47                                                | 7.78E-05       |
| <i>CSN1S1</i>      | 1.98                                                | 2.77E-04       |
| <i>TMEM120B</i>    | 1.69                                                | 1.83E-03       |
| <i>WNT5A</i>       | -2.24                                               | 2.22E-03       |
| <i>FASN</i>        | 1.56                                                | 3.70E-03       |
| <i>PAEP</i>        | 1.48                                                | 5.69E-03       |
| <i>CSN1S2</i>      | 1.45                                                | 6.93E-03       |
| <i>SLC34A2</i>     | 1.44                                                | 7.31E-03       |
| <i>RHOF</i>        | 1.45                                                | 7.66E-03       |
| <i>SLC39A8</i>     | 1.37                                                | 1.15E-02       |
| <i>CSTB</i>        | 1.53                                                | 1.50E-02       |
| <i>MFGE8</i>       | 1.26                                                | 1.82E-02       |
| <i>GPAM</i>        | 1.19                                                | 2.59E-02       |

**Figure S3.** qPCR validation of the miRNAs and mRNAs expression. (a) L compared to D, (b) H compared to D, (c) H compared to L, (d) L compared to H of RIP – seq and mRNA – seq, L compared to H of qPCR.

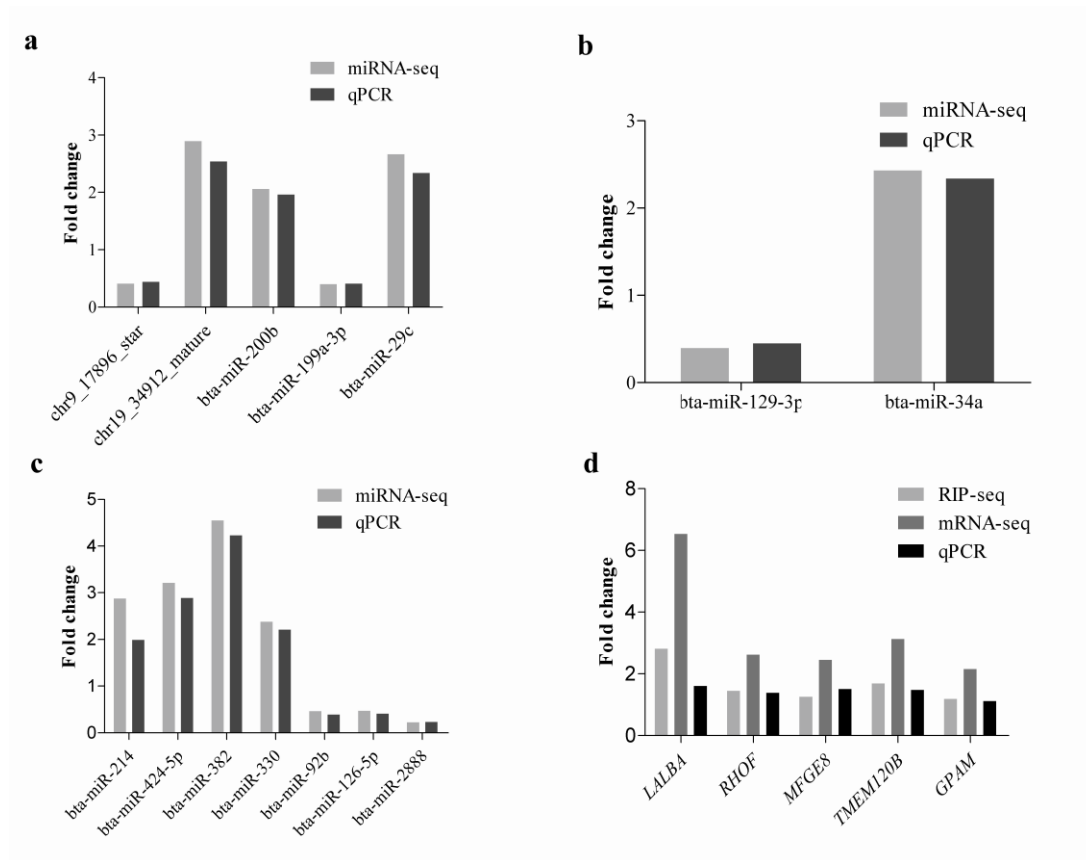

Supplement: 41598_2018_24727_MOESM2_ESM.pdf [file 41598_2018_24727_MOESM2_ESM.pdf]
